# Supplementary material for: The Cryptic Plastid of Euglena longa Defines a New Type of Nonphotosynthetic Plastid Organelle
Source: PubMed Central journal article supplement (PMC7580956; doi:10.1128/msphere.00675-20), 2020-10-21

### VTE5

0.2 substitution/site

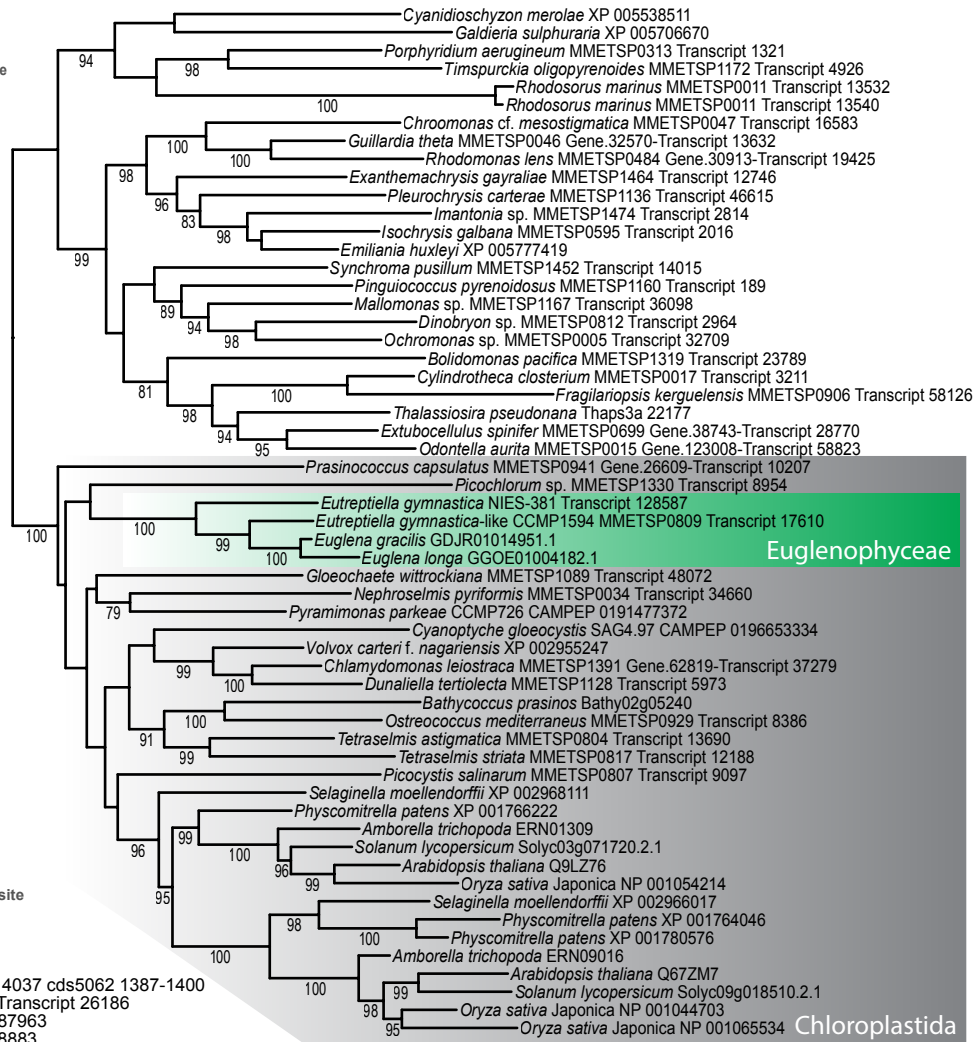

### VTE6

0.2 substitution/site

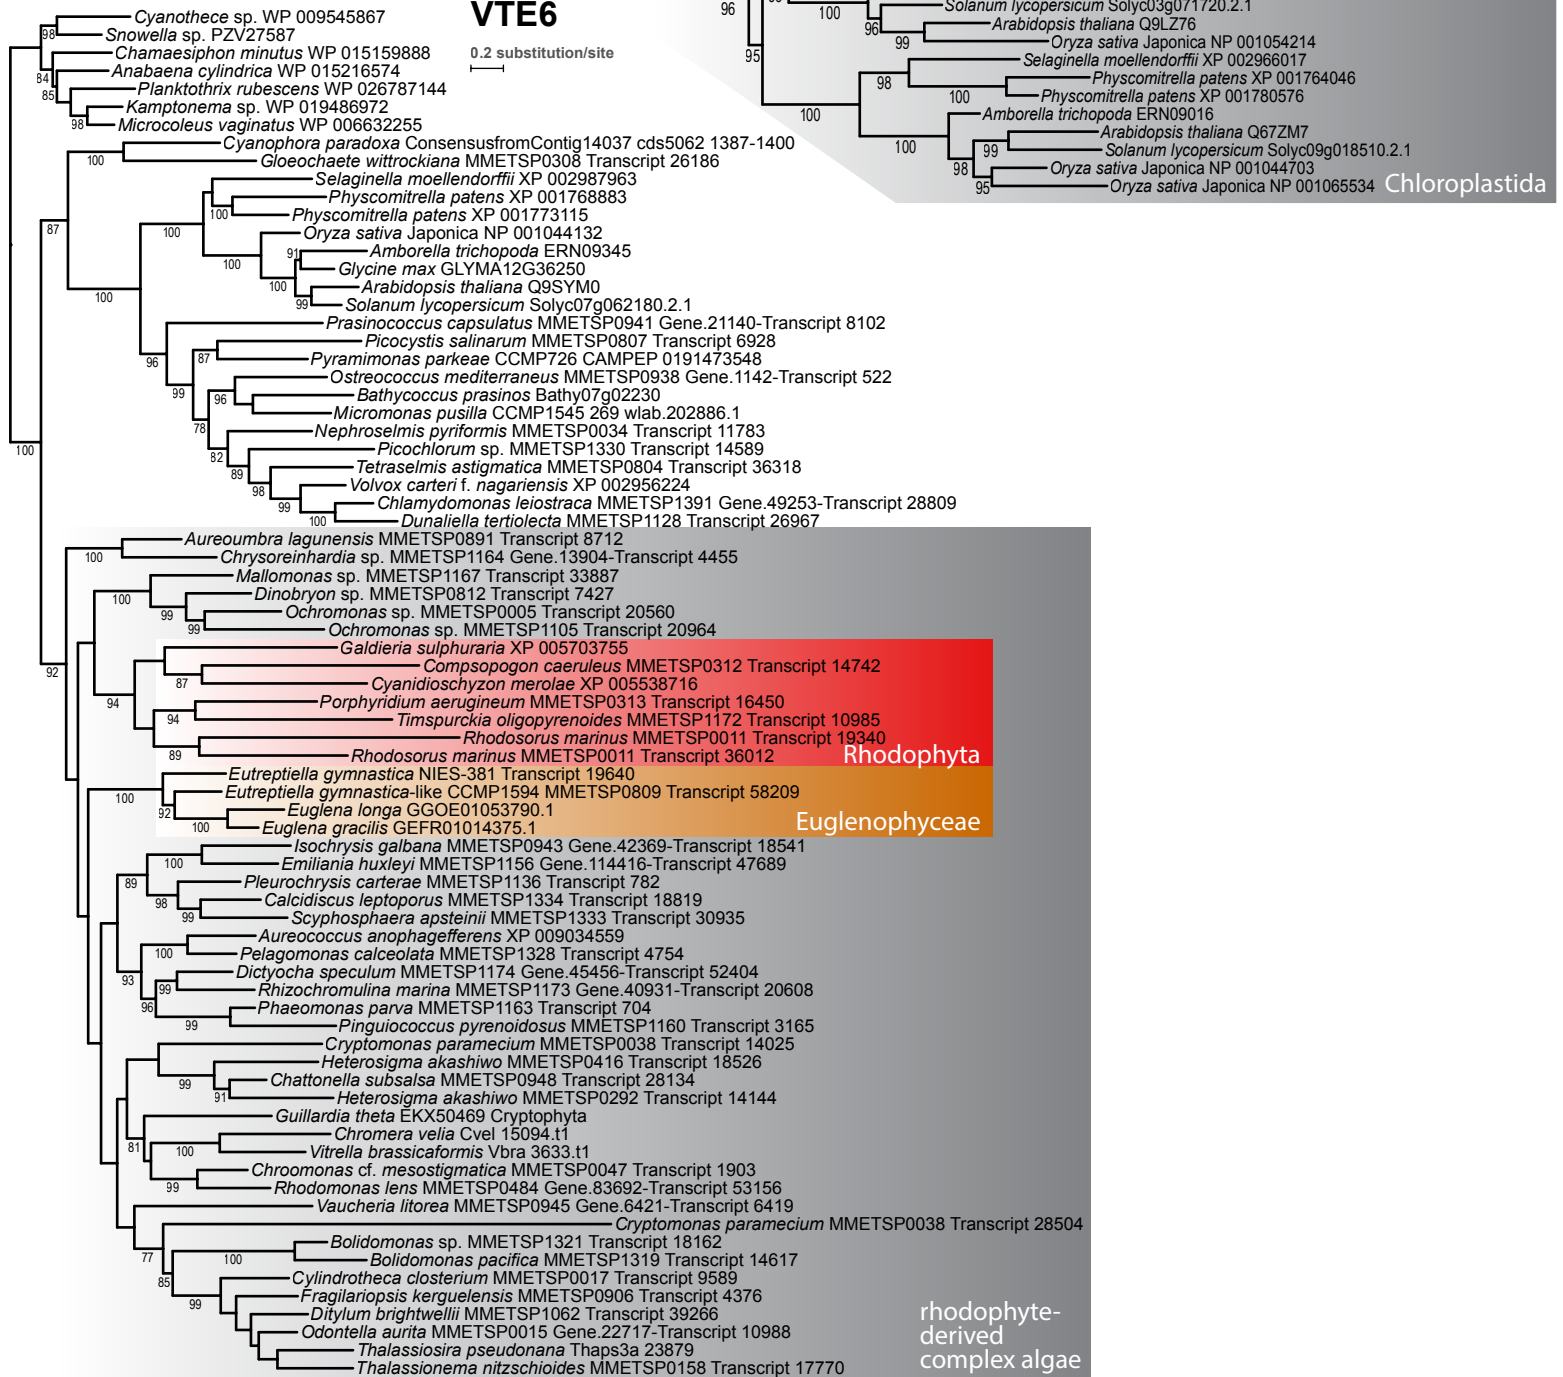

Supplement: mSphere.00675-20-sf001.pdf [file mSphere.00675-20-sf001.pdf]
