# Supplementary material for: The Cryptic Plastid of Euglena longa Defines a New Type of Nonphotosynthetic Plastid Organelle
Source: PubMed Central journal article supplement (PMC7580956; doi:10.1128/msphere.00675-20), 2020-10-21
Supplement: mSphere.00675-20-sf003.pdf [file mSphere.00675-20-sf003.pdf]

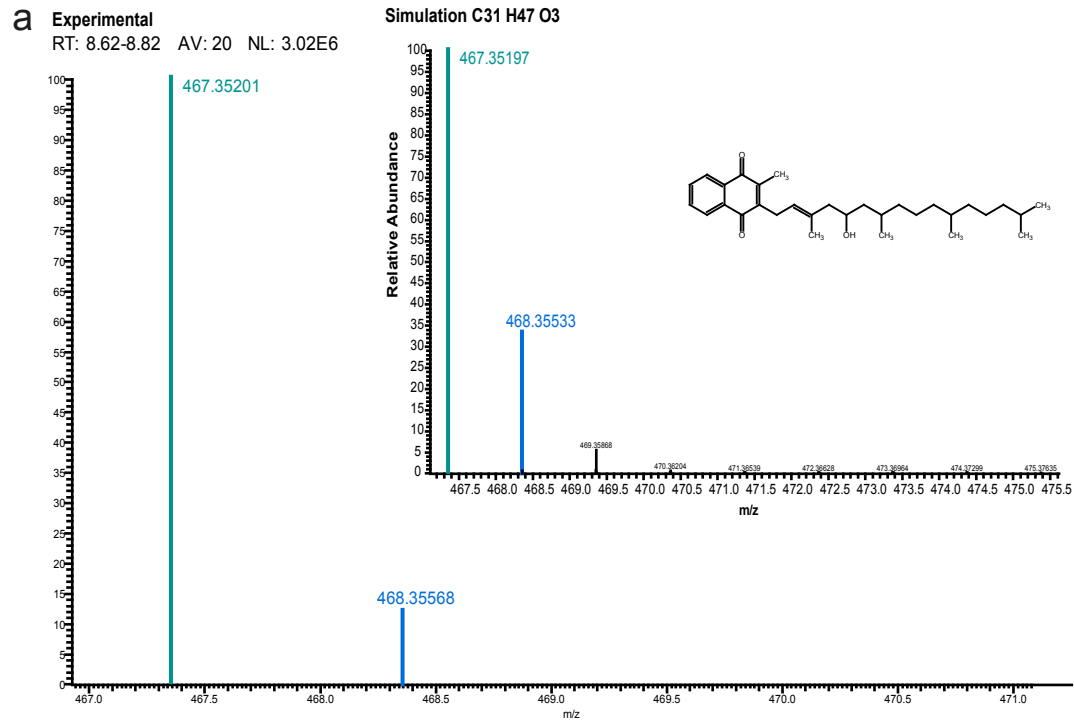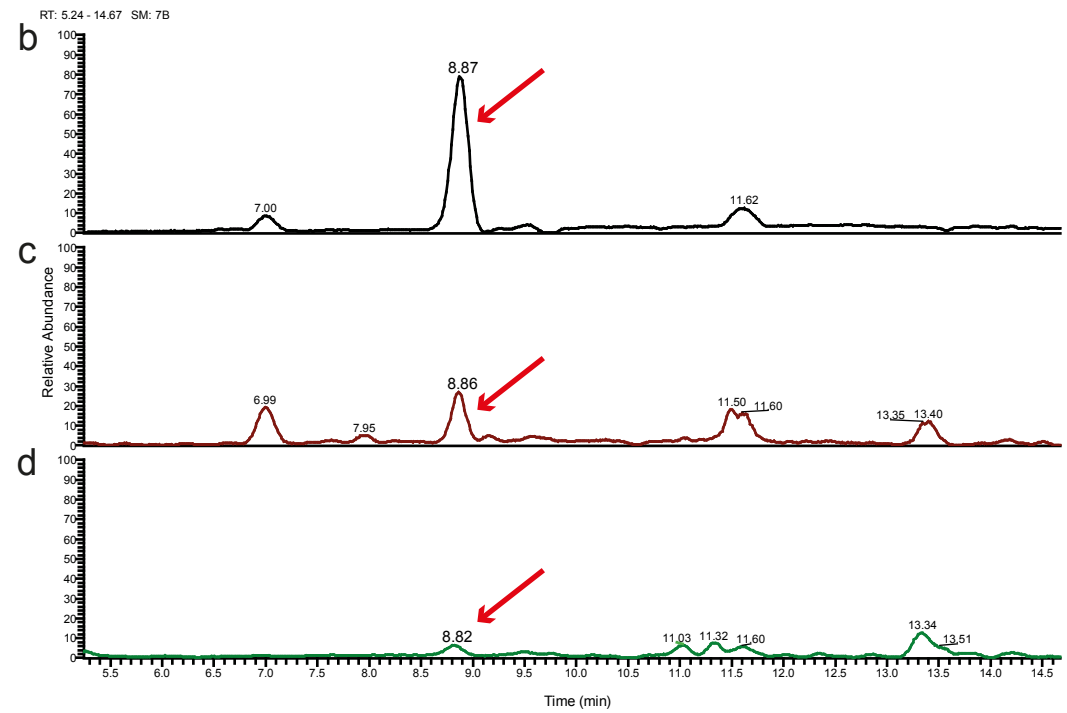

**e**

| 5 - hydroxyphyllolquinone        | [M+H] <sup>+</sup> [Da] | Δ [M+H] <sup>+</sup> [Da] |
|----------------------------------|-------------------------|---------------------------|
| simulation                       | 467.35197               |                           |
| <i>E. gracilis</i> autotrophic   | 467.35191               | 0.00006                   |
| <i>E. gracilis</i> heterotrophic | 467.35196               | 0.00001                   |
| <i>E. longa</i>                  | 467.35202               | -0.00005                  |
