# Supplementary material for: The Cryptic Plastid of Euglena longa Defines a New Type of Nonphotosynthetic Plastid Organelle
Source: PubMed Central journal article supplement (PMC7580956; doi:10.1128/msphere.00675-20), 2020-10-21
Supplement: mSphere.00675-20-sf004.pdf [file mSphere.00675-20-sf004.pdf]

### *Euglena longa*

### *Euglena gracilis*

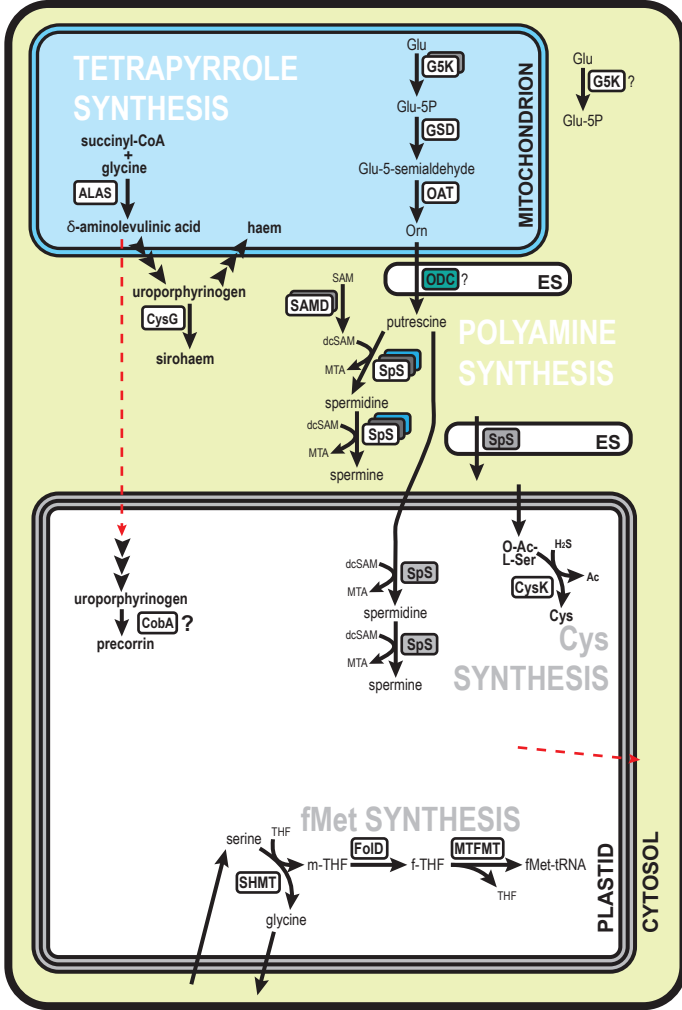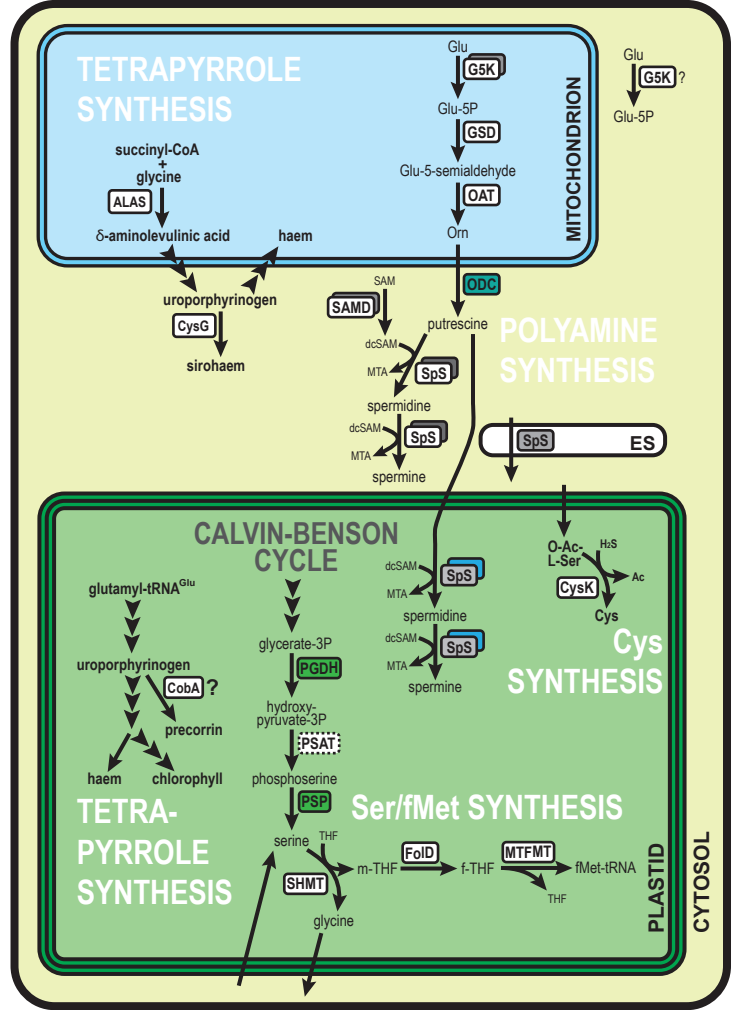

ES - endomembrane system    multiple copies    homolog only in *E. gracilis*    orthologs with different localisation    not found  
 orthologs with the same localisation
