# Supplementary material for: The Cryptic Plastid of Euglena longa Defines a New Type of Nonphotosynthetic Plastid Organelle
Source: PubMed Central journal article supplement (PMC7580956; doi:10.1128/msphere.00675-20), 2020-10-21
Supplement: mSphere.00675-20-sf005.pdf [file mSphere.00675-20-sf005.pdf]

# UDP-glucose epimerase

0.1 substitutions/site

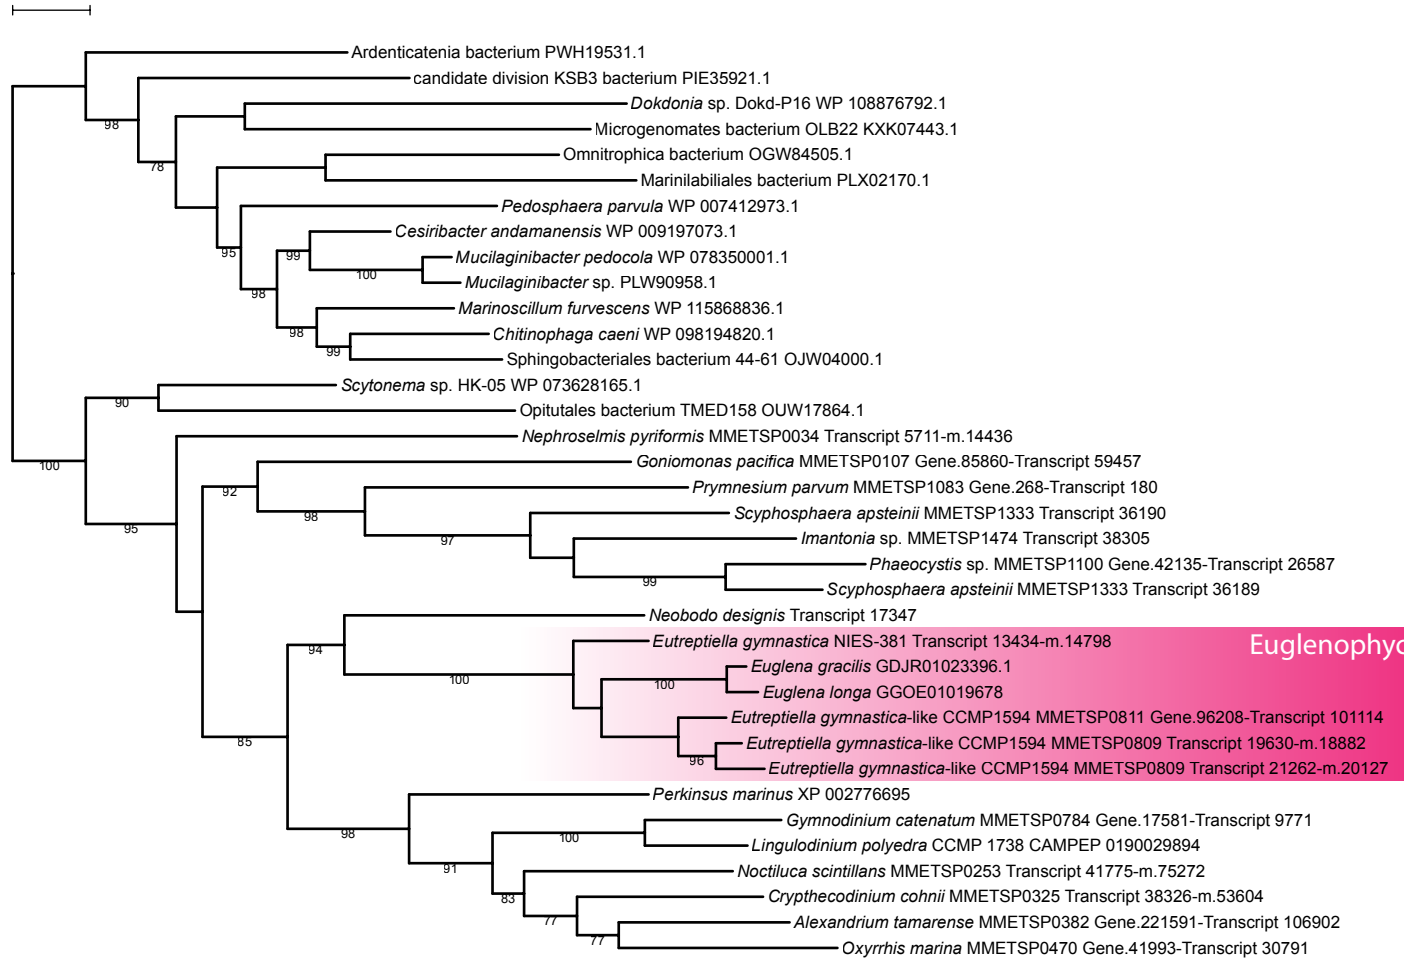

Euglenophyceae
