# Supplementary material for: The Cryptic Plastid of Euglena longa Defines a New Type of Nonphotosynthetic Plastid Organelle
Source: PubMed Central journal article supplement (PMC7580956; doi:10.1128/msphere.00675-20), 2020-10-21
Supplement: mSphere.00675-20-sf007.pdf [file mSphere.00675-20-sf007.pdf]

### Ferredoxin (motif CX4CX2CX22-33C)

*Spinacia oleracea* P00224.1 MDLPYSCRAGACSSCAGKVTSGSVDDQSFL EDGQME EIGWVLTTCIA  
*E. longa* GG0E01060910 IDVPYSCRAGACSSCAGILKAGTVDNADQSFLDEDDQVGKGFVLMCTTAI  
*E. gracilis* GDJR01015903 IDLPYSCRAGACSSCTGVVKAGTVDNSDQSFLDDQLGKGFVLTCTTAI

### Ferredoxin-thioredoxin reductase (motif CPCX16CPCX8CHC)

*Spinacia oleracea* P41348 PLCPCRHYDDKEAEAKQGFWNCPCVPMRERKECHCML  
*E. longa* GG0E01017915 PLCPCRNYEDKQAEAHQGYWNCPCVPMRERKECHCML  
*E. gracilis* GDJR01017870 PLCPCRNYEDKQAEANQGYWNCPCVPMRERKECHCML

### Thioredoxin f (motif WCGPC)

*Spinacia oleracea* 1F9M\_B WCGPCKA  
*E. longa* GG0E01014615 SCGP CSL  
*E. gracilis* GDJR01043100 WCGPCR L  
*E. longa* GG0E01021910 WCGPCKL  
*E. gracilis* GDJR01034242 WCGPCKL

### Fructose bisphosphatase

*Spinacia oleracea* XP\_02165511 GLIYSPNDEECIVDSDH-DDESQLS-----AEEQR CVVNV CQP G  
*E. longa* GG0E01062019 GLEFQED EDC T L A K N Q F D D S T D I S -----EAMKGC L M S T L K P G  
*E. gracilis* GDJR01008632 GLEFQED EDC T L A K N Q F D D S T D I S -----EAMKGC L R S T L K P G  
*E. longa* GG0E01002156 GLEFQRDE S C H L P E N F F P G E A K R L G T G P V E L E L E C L R N T L Q A G  
*E. gracilis* GEF01008714 GLEFERDE S C H L P E N F F P G E T K Q A G L -----L E Q Q C L R S T L Q A G  
*E. longa* GG0E01002030 SIYDTGAT --- P D T F -----S F L G P L  
*E. gracilis* GDJR01038835 SIYDMGAT --- P D S F -----S F L G P M

### Sedoheptulose bisphosphatase

*Triticum aestivum* CAA46507 TASC GGTA CVN S F  
*E. longa* GG0E01002308 TASC GGTA CTN V F  
*E. gracilis* ABF68591.1 TASC GGTA CN N V F

### Phosphoribulokinase

*Spinacia oleracea* M21338 AADSGCGKSTFMRRLT SV FGGAAEP PKG-----GNPDSNTLISD TTTVIC LDDFHS LDRN  
*E. longa* GG0E01013594 AADSGCGKSTFMRRLTGI FGGGKPTPLGGGF GA GGWETNTLVSDKITTVMCLDDYHLNDRN  
*E. gracilis* GEF01009012 AADSGCGKSTFMRRLTGI FGGGKPTPLGGGF GT GGWETNTLVSDKITTVMCLDDYHLNDRN

### Ribose phosphate isomerase

*Chlamydomonas reinhardtii* A8IRQ1 ASAKFVCIVDDSKLVEGLGGSKLAMPVEIVQFCHKYT LQ  
*E. longa* GG0E01054921 VSDKFVCIVDESKLCRGLGPG-FPLPVEITPFCHEHTMR  
*E. gracilis* GDJR01049108 VSDKFVCIVDESKLCRGLGPG-FPLPVEITPFCHEHTMR

### RuBisCO large subunit

*Chlamydomonas reinhardtii* P00877 DVIRSA CKWSP ELAAAC EVWKE I  
*E. longa* GG0E01001021 DIIREA CKYSRE LA AAC DVWKE V  
*E. gracilis* NP\_041936 DVIREA CKWSP ELAAAC EVWKE I

### RuBisCO small subunit

*Chlamydomonas reinhardtii* P00873 RFGS V S C L YYDNRYWTMWK L P M F G C R D P M Q V L R E I V A C T K A F P  
*E. longa* GG0E01002275 RFSGTT S GYYDNRYWTMWK L P M F G C T D P S Q V L K E I D E C C K T F P  
*E. gracilis* CAA35584 RFSGTAAGYYDNRYWTMWK L P M F G C T D A S Q V L R E I S E C R R A Y P
